# Supplementary material for: Efficacy of digital templates in edentulous implant placement: a retrospective study
Source: PubMed Central journal article supplement — BMC Oral Health. 2024 Dec 19;24:1503. doi: 10.1186/s12903-024-05265-8 (PMC11660902; doi:10.1186/s12903-024-05265-8), 2024-12-19

## Institutional Review Board

West China Hospital of Stomatology  
Sichuan University  
No.14, 3<sup>rd</sup> Section, Renminnan Rd.  
Chengdu, Sichuan 610041, China  
Telephone: +86-28-85503684  
Facsimile: +86-28-85503684  
E-mail: hxkqlunli@163.com

**To: Feng Luo**

West China Hospital of Stomatology, Sichuan University

**Study Title:**

Enhancing Precision in Dental Implantology: A Retrospective Study on Guide Plate Efficacy

**Approval Date:** 03/21/2024      **Expiration Date of Approval:** 03/20/2025

**Submission type:** Initial      **Approval type:** Quick review

**IRB Reference Number:** WCHS-IRB-CT-2024-177 (Please quote this ref # on all correspondence)

Following files were reviewed:

|                               |          |
|-------------------------------|----------|
| Ethical Application Form      | 20240314 |
| Protocol                      | 20240314 |
| Consent Form                  | 20240314 |
| Participant Information Sheet | 20240314 |

The West China Hospital of Stomatology Institutional Review Board (WCSHIRB) has formally APPROVED this projects for the period indicated, in accordance with regulations or guidelines quoted below:

1. Quality Management Regulation for Good Clinical Practice By Food and Drug Administration, PRC 2003
2. Ethical Approval Review Methodology for Biomedical Research, PRC 2007
3. Management Regulation for Medical Technology Application By Ministry of Public Health, PRC 2009
4. The principle for ethical review of clinical trail. By Food and Drug Administration, PRC 2010
5. The Declaration of Helsinki(2008)

**Investigators' Responsibilities:**

If you are unable to undertake the research activities before the expiration date, it is the Principal Investigator's responsibility to submit an application for extension and obtain approval before the expiration date. The written application for extension should be received by the WCSHIRB at least 30 days before the expiration date.

Any changes to any aspect of this study should be reported to IRB and obtain IRB approval before they can be implement. Any unanticipated problem, incompliance to protocol serious adverse event, should be reported to IRB.

Yours sincerely



Chairmen of WCSHIRB

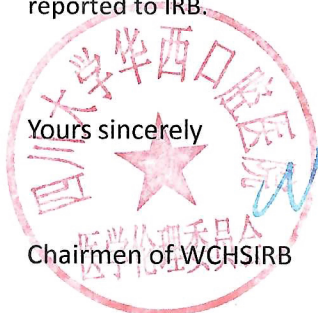

Supplement: 12903_2024_5265_MOESM1_ESM.pdf [file 12903_2024_5265_MOESM1_ESM.pdf]
